# Supplementary material
Source: publisher site journal article supplement (https://www.dovepress.com/article/473335)
Supplement: Supplementary file 1 [file get_supplementary_file.php]

Table S1 Different genetic subforms have been identified in FHM

| Type | Mutant genes | This Case |
| --- | --- | --- |
| FHM1 | CACNA1A | No |
| FHM2 | ATP1A2 | Yes |
| FHM3 | SCN1A | No |

Familial hemiplegic migraine (FHM) Description: Migraine with aura including motor weakness, and at least one first- or second-degree relative has migraine aura including motor weakness.New genetic data have allowed a more precise definition of familial hemiplegic migraine than was previously possible. Specific genetic subforms have been identified: in FHM1 there are mutations in the CACNA1A gene (coding for a calcium channel) on chromosome 19; in FHM2 there are mutations in the ATP1A2 gene (coding for a K/Na-ATPase) on chromosome 1; and in FHM3 there are mutations in the SCN1A gene (coding for a sodium channel) on chromosome 2.
